# Supplementary material for: Regional Variation in Human Exposure to Persistent Organic Pollutants in the United States, NHANES
Source: Hindawi journal article supplement (doi:10.1155/2015/571839), 2015-01-01
Supplement: f1 [file 571839.f1.pdf]

## Supplemental Tables

**Table S-1. Summary of NHANES Environmental Chemicals and Available Cycles\***

| <b>Table/Figure</b>                                | <b>Analytes</b>                                               | <b>NHANES Survey Years with at least 60% detection rate</b>                                                                                           |
|----------------------------------------------------|---------------------------------------------------------------|-------------------------------------------------------------------------------------------------------------------------------------------------------|
| Table 1                                            | PCB 28, PCB 52, PCB 101, PCB 74, PCB 99, PCB 196/203, PCB 206 | 2003-2004                                                                                                                                             |
| Table 2                                            | PCB 138/158, PCB 153, HxCDD, HpCDD                            | 2001-2004                                                                                                                                             |
| Table 3                                            | pp-DDE                                                        | 1999-2004                                                                                                                                             |
| Table 4                                            | PBDEs                                                         | 2003-2004                                                                                                                                             |
| Table 5                                            | Sum of 35 PCBs and Total TEQs                                 | 2003-2004                                                                                                                                             |
|                                                    |                                                               |                                                                                                                                                       |
| Figure 2                                           | PFCs (PFOS, PFNA, PFHxS and PFOA)                             | 2003-2010<br>2 year cycle data are available since 1999; there is a continuous decreasing trend for PFOS, and a continuous increasing trend for PFNA. |
| *The RDC proposal was submitted in September 2011. |                                                               |                                                                                                                                                       |

| <b>Table S-2. Geometric mean and selected percentiles of serum perfluorinated compound concentrations (in µg/L) for the U.S. population by geographic area, NHANES 2003-2010</b> |                                    |                            |                        |
|----------------------------------------------------------------------------------------------------------------------------------------------------------------------------------|------------------------------------|----------------------------|------------------------|
|                                                                                                                                                                                  | <b>Age 20 years and older</b>      |                            |                        |
|                                                                                                                                                                                  | <b>Geometric mean<br/>(95% CI)</b> | <b>Percentile (95% CI)</b> |                        |
|                                                                                                                                                                                  |                                    | <b>50<sup>th</sup></b>     | <b>90<sup>th</sup></b> |
| <b>Perfluorononanoic acid (PFNA)</b>                                                                                                                                             |                                    |                            |                        |
| <b>Northeast</b>                                                                                                                                                                 | 1.4 (1.2-1.6) <sup>a,b</sup>       | 1.4 (1.1-1.8)              | 2.9 (2.6-3.4)          |
| <b>Midwest</b>                                                                                                                                                                   | 1.2 (1.1-1.2) <sup>a</sup>         | 1.2 (1.1-1.3)              | 2.2 (2.0-2.4)          |
| <b>South</b>                                                                                                                                                                     | 1.6 (1.3-1.8) <sup>b</sup>         | 1.6 (1.4-1.8)              | 4.2 (3.0-5.9)          |
| <b>West</b>                                                                                                                                                                      | 0.9 (0.8-1.0) <sup>c</sup>         | 1.0 (0.9-1.1)              | 2.0 (1.9-2.1)          |
| <b>Perfluorohexane sulfonic acid (PFHxS)</b>                                                                                                                                     |                                    |                            |                        |
| <b>Northeast</b>                                                                                                                                                                 | 1.5 (1.2-1.7) <sup>a</sup>         | 1.6 (1.2-1.9)              | 4.2 (3.4-5.2)          |
| <b>Midwest</b>                                                                                                                                                                   | 1.7 (1.5-1.9) <sup>a</sup>         | 1.7 (1.5-1.9)              | 5.4 (4.8-5.9)          |
| <b>South</b>                                                                                                                                                                     | 2.1 (1.8-2.4) <sup>b</sup>         | 2.1 (1.9-2.4)              | 6.3 (4.8-9.0)          |
| <b>West</b>                                                                                                                                                                      | 1.5 (1.4-1.6) <sup>a</sup>         | 1.6 (1.4-1.8)              | 4.2 (3.7-4.5)          |
| <b>Perfluorooctanoic acid (PFOA)</b>                                                                                                                                             |                                    |                            |                        |
| <b>Northeast</b>                                                                                                                                                                 | 3.8 (3.4-4.2) <sup>a,b</sup>       | 4.0 (3.7-4.4)              | 7.3 (6.5-8.3)          |
| <b>Midwest</b>                                                                                                                                                                   | 3.6 (3.2-3.9) <sup>a</sup>         | 3.7 (3.4-4.0)              | 7.2 (5.8-8.9)          |
| <b>South</b>                                                                                                                                                                     | 4.3 (3.9-4.7) <sup>b</sup>         | 4.6 (4.2-5.0)              | 9.6 (7.9-11.6)         |
| <b>West</b>                                                                                                                                                                      | 3.2 (3.0-3.4) <sup>a</sup>         | 3.5 (3.2-3.7)              | 6.9 (6.5-7.3)          |
| <b>Perfluorooctane sulfonic acid (PFOS)</b>                                                                                                                                      |                                    |                            |                        |
| <b>Northeast</b>                                                                                                                                                                 | 13.3 (11.4-15.1) <sup>a</sup>      | 13.7 (11.9-16.0)           | 30.3 (27.6-33.7)       |
| <b>Midwest</b>                                                                                                                                                                   | 14.2 (13.0-15.3) <sup>a</sup>      | 15.0 (13.6-16.3)           | 34.5 (32.3-38.0)       |
| <b>South</b>                                                                                                                                                                     | 17.9 (15.8-20.0) <sup>b</sup>      | 19.3 (17.1-21.7)           | 44.7 (38.9-54.6)       |
| <b>West</b>                                                                                                                                                                      | 11.9 (10.7-13.0) <sup>a</sup>      | 12.6 (11.5-13.9)           | 29.1 (25.9-32.2)       |

\* Regional means with the same letter superscript are NOT significantly different from each other based on analysis of covariance adjusting for age, smoking status, gender and race/ethnicity.
